# Supplementary material
Source: publisher figshare collection journal article supplement (https://future-science-group.figshare.com/ndownloader/files/31491305)
Supplement: Supplementary file 1 [file 31491305]

Supplementary table 2: Percentage of individuals 15-49 years in Alberta within 3 censuses (2006-2011-2016) *:

| Year | Percentage (men) | Percentage (women) |
| --- | --- | --- |
| 2006 | 53.5% | 52.5% |
| 2011 | 51.5% | 50.5% |
| 2016 | 49.7% | 48.7% |

*Sources: [2006 Census of Canada: Topic-based tabulations (statcan.gc.ca)](https://www12.statcan.gc.ca/census-recensement/2006/dp-pd/tbt/Rp-eng.cfm?TABID=2&LANG=E&APATH=3&DETAIL=0&DIM=0&FL=A&FREE=0&GC=0&GID=823128&GK=0&GRP=1&PID=88981&PRID=0&PTYPE=88971,97154&S=0&SHOWALL=0&SUB=0&Temporal=2006&THEME=66&VID=0&VNAMEE=&VNAMEF=&D1=0&D2=0&D3=0&D4=0&D5=0&D6=0); [Census Profile (statcan.gc.ca)](https://www12.statcan.gc.ca/census-recensement/2011/dp-pd/prof/details/page.cfm?Lang=E&Geo1=PR&Code1=48&Geo2=PR&Code2=01&Data=Count&SearchText=alberta&SearchType=Begins&SearchPR=01&B1=All&Custom=&TABID=1); [Census Profile, 2016 Census - Alberta [Province] and Canada [Country] (statcan.gc.ca)](https://www12.statcan.gc.ca/census-recensement/2016/dp-pd/prof/details/Page.cfm?Lang=E&Geo1=PR&Code1=48&Geo2=&Code2=&Data=Count&SearchType=Begins&SearchPR=01&B1=All).
